# Supplementary material for: The effects of target contrast on Drosophila courtship
Source: Oxford University Press journal article supplement (doi:10.1242/jeb.203414), 2019-01-01
Supplement: jeb203414supp.pdf [file jeb203414supp.pdf]

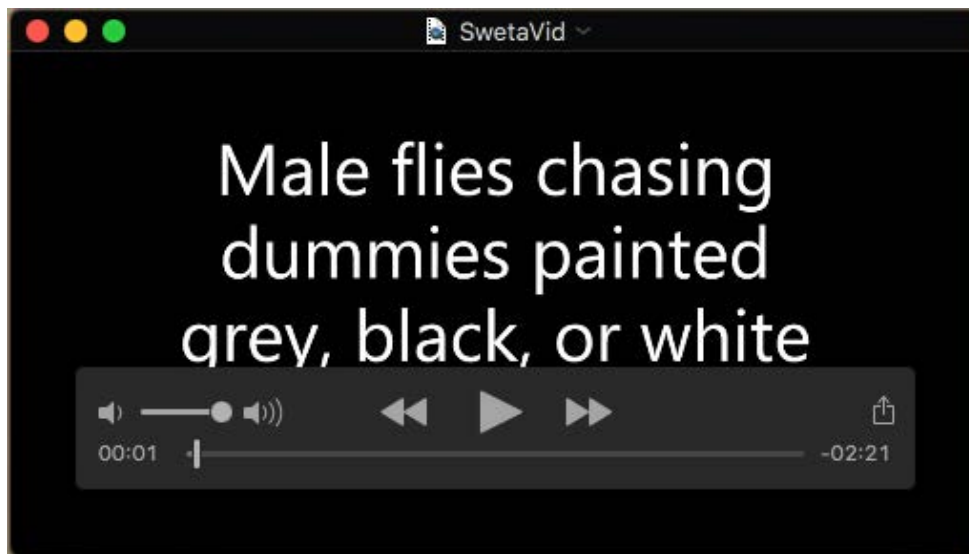

**Movie 1. Male *D. melanogaster* chasing dummies painted grey, black, or white.** Videos of example chases are provided. All chases are with a  $1.6 \times 1.6 \times 0.8 \text{ mm}^3$  dummy moving at  $5 \text{ mm s}^{-1}$ . The movie has been sped up 3x.
